# Supplementary material for: Brain morphometry in 22q11.2 deletion syndrome: an exploration of differences in cortical thickness, surface area, and their contribution to cortical volume
Source: Springer Nature journal article supplement (doi:10.1038/s41598-020-75811-1), 2020-11-02
Supplement: MOESM1 [file 41598_2020_75811_MOESM1_ESM.pdf]

## Supplementary Materials

**Title:** Brain Morphometry in 22q11.2 Deletion Syndrome: An exploration of differences in cortical thickness, surface area, and their contribution to cortical volume.

**Authors:** M. Gudbrandsen MSc<sup>a</sup>, E. Daly PhD<sup>a</sup>, C.M. Murphy PhD<sup>a,b</sup>, C.E. Blackmore MSc<sup>a,b</sup>, M. Rogdaki PhD<sup>c,d</sup>, C. Mann PhD<sup>e</sup>, A. Bletsch PhD<sup>e</sup>, L. Kushan MSc<sup>f</sup>, C.E. Bearden PhD<sup>f</sup>, D.G.M. Murphy PhD<sup>a</sup>, M.C. Craig PhD<sup>a,g</sup> & C. Ecker PhD<sup>e</sup>

|                                                                                                                             |   |
|-----------------------------------------------------------------------------------------------------------------------------|---|
| S1 – Nested model comparison of Age effects .....                                                                           | 2 |
| S2 – Cortical Thickness clusters of significant differences in 22q11.2DS compared to controls..                             | 3 |
| S3 – Cortical Thickness and Surface Area clusters of significant differences in 22q11.2DS compared to controls.....         | 4 |
| S4 – Subgroup analysis of prodromal symptoms of psychosis .....                                                             | 5 |
| S5 – Cortical volume, cortical thickness and surface areas clusters with significant group-by-age linear interactions ..... | 6 |
| S6 – Group-by-IQ associations .....                                                                                         | 7 |
| S7 – Cortical Volume clusters of significant differences in 22q11.2DS compared to controls.....                             | 8 |

## S1 – Nested model comparison of Age effects

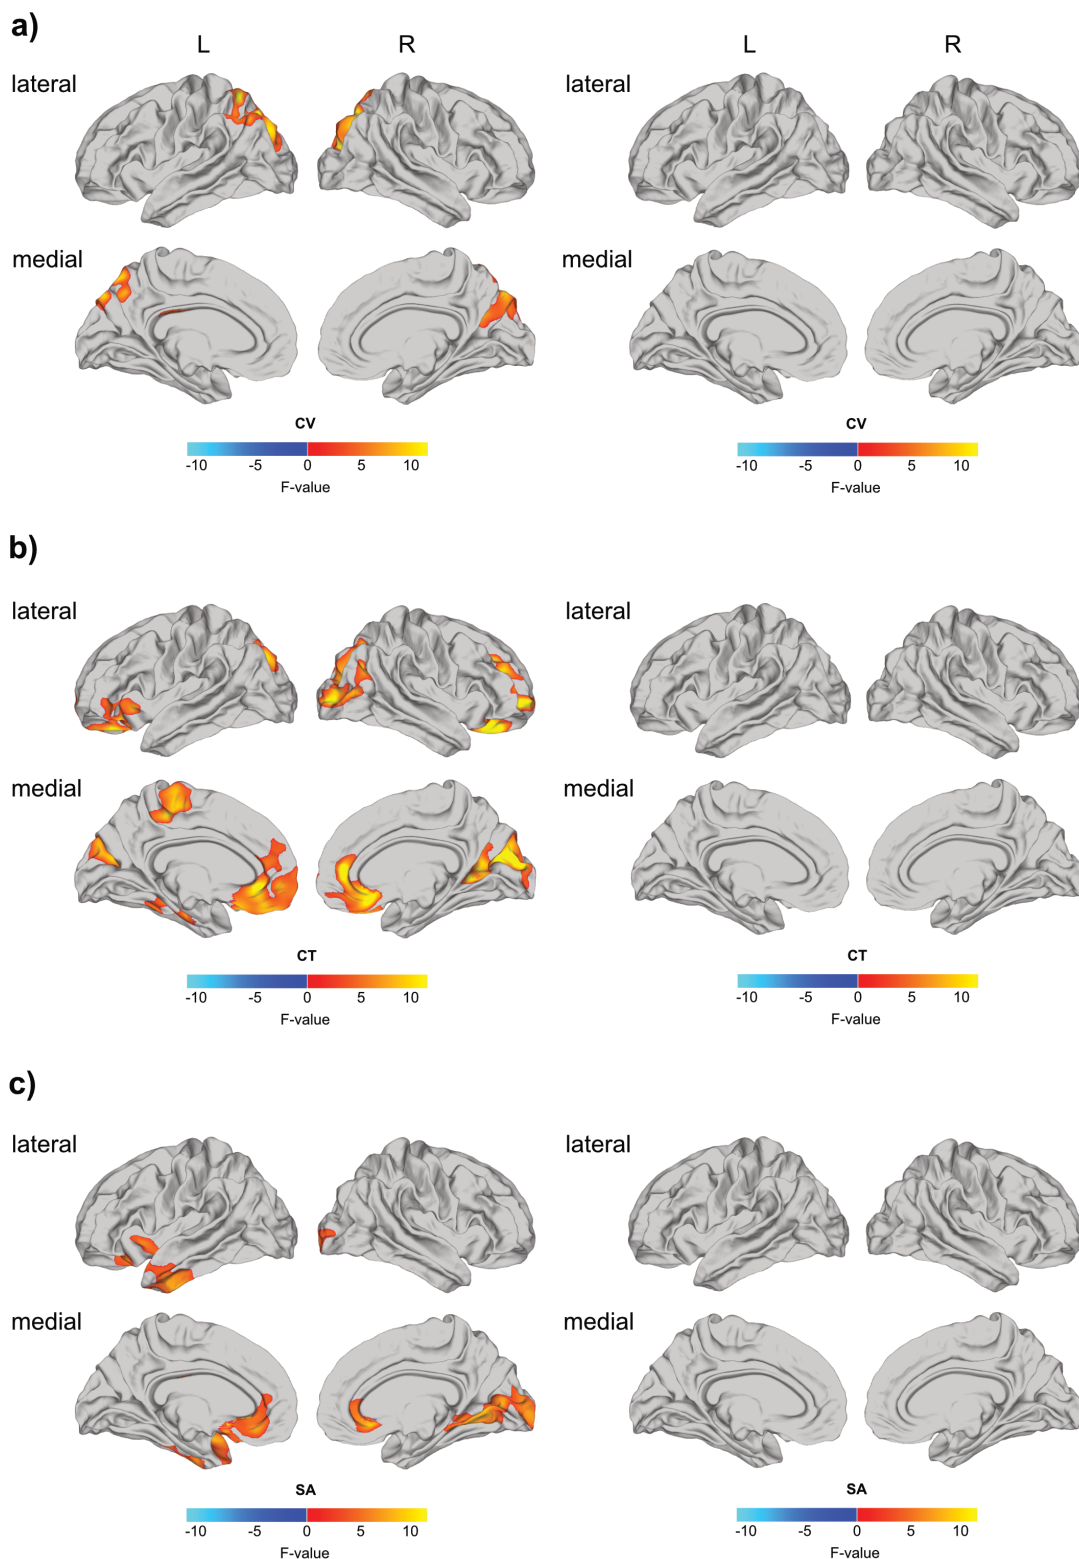

Nested model comparisons for (a) cortical volume (CV), (b) cortical thickness (CT), and (c) surface area (SA). The right panel shows the comparison of the linear vs. quadratic model, and the left panel shows the quadratic model vs. cubic model, including all age effects and age-by-group interactions. *F*-values (blue to red) indicate voxels where the more complex model provided a better fit than the more reduced model (*F*-statistic, thresholded). Model comparisons are indicated by random-field theory (RFT)-based, cluster-corrected ( $p < 0.05$ ) difference maps in goodness of fit (based on *F*-statistics).

**S2 – Cortical Thickness clusters of significant differences in 22q11.2DS compared to controls**

| Contrast       | Cluster | Region Labels                                                                                                                                                                                                                          | Hemisphere | BA                  | Vertices | Talairach |     |     | $t_{max}$ | $p_{cluster}$        |
|----------------|---------|----------------------------------------------------------------------------------------------------------------------------------------------------------------------------------------------------------------------------------------|------------|---------------------|----------|-----------|-----|-----|-----------|----------------------|
|                |         |                                                                                                                                                                                                                                        |            |                     |          | x         | y   | z   |           |                      |
| CT             |         |                                                                                                                                                                                                                                        |            |                     |          |           |     |     |           |                      |
| Case > Control |         |                                                                                                                                                                                                                                        |            |                     |          |           |     |     |           |                      |
|                | 1       | Caudal middle frontal gyrus, lateral orbital frontal cortex, medial orbitofrontal cortex, pars orbitalis, pars triangularis, precentral gyrus, rostral anterior cingulate cortex, rostral middle frontal gyrus, superior frontal gyrus | R          | 8-11, 24, 32, 46-47 | 14612    | 10        | 25  | -16 | 4.40      | $1.1 \times 10^{-5}$ |
|                | 2       | Lateral orbital frontal cortex, medial orbitofrontal cortex, rostral anterior cingulate gyrus, superior frontal gyrus                                                                                                                  | L          | 8-11, 24, 32, 43-47 | 8442     | -7        | 33  | -6  | 4.46      | $1.1 \times 10^{-5}$ |
|                | 3       | Postcentral gyrus, precentral gyrus, supramarginal gyrus                                                                                                                                                                               | R          | 1-4, 40             | 6063     | 42        | -12 | 29  | 4.43      | $1.8 \times 10^{-5}$ |
|                | 4       | Cuneus cortex, lateral occipital cortex, lingual gyrus & pericalcarine cortex                                                                                                                                                          | R          | 17-19               | 4676     | 6         | -72 | 6   | 4.34      | $2.0 \times 10^{-5}$ |
|                | 5       | Rostral middle frontal gyrus, superior frontal gyrus                                                                                                                                                                                   | L          | 4, 6, 8-9           | 3959     | -22       | 39  | 20  | 3.72      | $2.4 \times 10^{-5}$ |
|                | 6       | Cuneus cortex, lateral occipital cortex, lingual gyrus & pericalcarine cortex                                                                                                                                                          | L          | 17 - 19             | 4433     | -5        | -81 | 3   | 4.52      | $3.5 \times 10^{-5}$ |
|                | 7       | Isthmus-cingulate cortex, posterior-cingulate cortex & precuneus cortex                                                                                                                                                                | R          | 4, 6, 32-33, 44, 52 | 4149     | 7         | -19 | 37  | 3.68      | $5.1 \times 10^{-5}$ |
|                | 8       | Inferior temporal gyrus, middle temporal gyrus, temporal pole                                                                                                                                                                          | L          | 20-21, 32-          | 3303     | -53       | -8  | -23 | 4.82      | $1.9 \times 10^{-4}$ |
|                | 9       | Insula, postcentral gyrus, supramarginal gyrus                                                                                                                                                                                         | R          | 40                  | 3866     | 36        | -14 | 7   | 4.23      | $1.0 \times 10^{-3}$ |
|                | 10      | Postcentral gyrus, supramarginal gyrus                                                                                                                                                                                                 | L          | 10, 46              | 2714     | -56       | -38 | 36  | 4.06      | $3.8 \times 10^{-3}$ |
|                | 11      | Rostral middle frontal gyrus                                                                                                                                                                                                           | L          | 46                  | 2311     | -35       | 35  | 12  | 3.83      | $4.4 \times 10^{-3}$ |
| Case < Control |         |                                                                                                                                                                                                                                        |            |                     |          |           |     |     |           |                      |
|                | 12      | Caudal anterior-cingulate cortex                                                                                                                                                                                                       | L          | 24                  | 338      | -1        | 21  | 16  | -5.00     | $1.0 \times 10^{-5}$ |
|                | 13      | Caudal anterior-cingulate cortex, posterior-cingulate cortex                                                                                                                                                                           | R          | 33                  | 872      | 3         | 9   | 24  | -3.62     | $1.0 \times 10^{-5}$ |
|                | 14      | Uncus                                                                                                                                                                                                                                  | R          | 28                  | 84       | 25        | -9  | -25 | -3.14     | $1.6 \times 10^{-5}$ |

Hemisphere: L : Left, R : Right; BA: approximate Brodmann area at  $t_{max}$ ; vertices: number of vertices within the cluster;  $t_{max}$ : maximum t-statistic within the cluster; Pcluster: cluster-corrected p-value.

**S3 – Cortical Thickness and Surface Area clusters of significant differences in 22q11.2DS compared to controls**

| Contrast       | Cluster | Region Labels                                                                                                                                                                                                                                                                                                                                                                                                                                                                                                                                                                                                                                                                                                                                                | Hemisphere | BA                                         | Vertices | Talairach |     |    | $t_{max}$ | $p_{cluster}$        |
|----------------|---------|--------------------------------------------------------------------------------------------------------------------------------------------------------------------------------------------------------------------------------------------------------------------------------------------------------------------------------------------------------------------------------------------------------------------------------------------------------------------------------------------------------------------------------------------------------------------------------------------------------------------------------------------------------------------------------------------------------------------------------------------------------------|------------|--------------------------------------------|----------|-----------|-----|----|-----------|----------------------|
|                |         |                                                                                                                                                                                                                                                                                                                                                                                                                                                                                                                                                                                                                                                                                                                                                              |            |                                            |          | x         | y   | z  |           |                      |
| SA             |         |                                                                                                                                                                                                                                                                                                                                                                                                                                                                                                                                                                                                                                                                                                                                                              |            |                                            |          |           |     |    |           |                      |
| Case < Control |         |                                                                                                                                                                                                                                                                                                                                                                                                                                                                                                                                                                                                                                                                                                                                                              |            |                                            |          |           |     |    |           |                      |
|                | 1       | Banks superior temporal sulcus, caudal anterior-cingulate cortex, caudal middle frontal gyrus, cuneus cortex, entorhinal cortex, frontal pole, fusiform gyrus, inferior parietal cortex, inferior temporal gyrus, isthmus-cingulate cortex, lateral occipital cortex, lateral orbital frontal cortex, lingual gyrus, medial orbital frontal cortex, middle temporal gyrus, paracentrale lobule, parahippocampal gyrus, pars opercularis, pars triangularis, pericalcarine cortex, postcentral gyrus, precuneus cortex, rostral anterior cingulate gyrus, rostral middle frontal gyrus, superior frontal gyrus, superior parietal cortex, superior temporal gyrus, temporal pole, transverse temporal cotex.                                                  | L          | 1-7, 9-11, 17, 19-24, 32-33, 37-38, 40, 46 | 81708    | -15       | -65 | 15 | -7.12     | $4.9 \times 10^{-6}$ |
|                | 2       | Banks superior temporal sulcus, caudal anterior-cingulate cortex, caudal middle frontal gyrus, cuneus cortex, entorhinal cortex, frontal pole, fusiform gyrus, inferior parietal cortex, inferior temporal gyrus, isthmus-cingulate cortex, lateral occipital cortex, lateral orbital frontal cortex, lingual gyrus, medial orbital frontal cortex, middle temporal gyrus, paracentrale lobule, parahippocampal gyrus, pars triangularis, pericalcarine cortex, postcentral gyrus, posterior-cingulate cortex, precentral gyrus, precuneus cortex, rostral anterior cingulate gyrus, rostral middle frontal gyrus, superior frontal gyrus, superior parietal cortex, superior temporal gyrus, supramarginal gyrus, temporal pole, transverse temporal cotex. | R          | 1-3, 17, 19-24, 28, 37-38, 40, 45-46       | 82590    | 14        | -77 | 15 | -7.30     | $4.9 \times 10^{-6}$ |
|                | 3       | Posterior-cingulate cortex                                                                                                                                                                                                                                                                                                                                                                                                                                                                                                                                                                                                                                                                                                                                   | L          | 24                                         | 47       | -2        | -7  | 27 | -3.27     | $2.8 \times 10^{-2}$ |
|                | 4       | Posterior-cingulate cortex                                                                                                                                                                                                                                                                                                                                                                                                                                                                                                                                                                                                                                                                                                                                   | R          | 24                                         | 40       | 3         | 7   | 25 | -3.64     | $3.2 \times 10^{-2}$ |

Hemisphere: L: Left, R: Right; BA: approximate Brodmann area at  $t_{max}$ ; vertices: number of vertices within the cluster; tmax; maximum t-statistic within the cluster; Pcluster: cluster-corrected p-value.

## S4 – Subgroup analysis of prodromal symptoms of psychosis

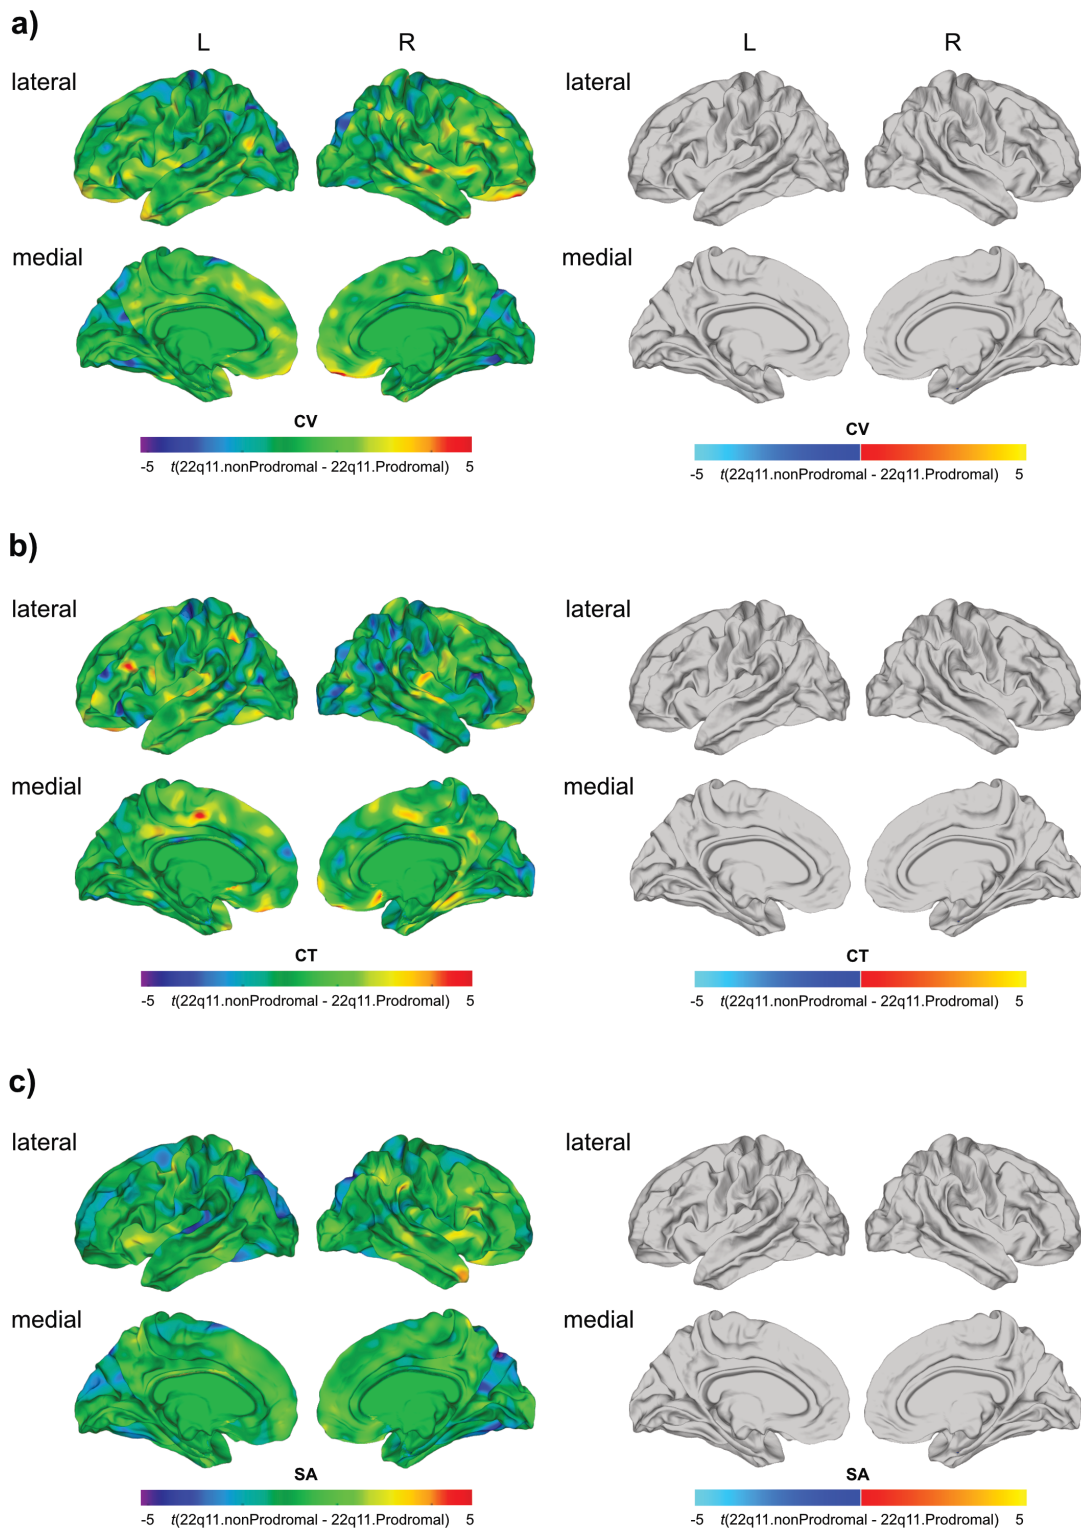

Significant differences in (a) cortical volume (CV), (b) cortical thickness (CT), and (c) surface area (SA) in individuals with 22q11.2DS and no prodromal symptoms of psychosis (22q11.nonProdromal), compared to individuals with 22q11.2DS and prodromal symptoms of psychosis (22q11. Prodromal). The left panel shows the un-thresholded  $t$ -maps, where increases in 22q11.nonProdromal relative to 22q11.Psychosis are indicated in yellow to red, and decreases in blue to purple. The right panel shows random-field-theory (RFT)-based cluster-corrected ( $p < 0.05$ , two-tailed) difference maps. Following correction for multiple comparisons, there were no significant group differences between 22q11.nonProdromal and 22q11. Prodromal in any of the examined cortical descriptors.

**S5 – Cortical volume, cortical thickness and surface areas clusters with significant group-by-age linear interactions**

| Contrast | Cluster | Region Labels                                                                   | Hemisphere | BA        | Vertices | Talairach |     |    | $t_{max}$ | $p_{cluster}$        |
|----------|---------|---------------------------------------------------------------------------------|------------|-----------|----------|-----------|-----|----|-----------|----------------------|
|          |         |                                                                                 |            |           |          | x         | y   | z  |           |                      |
| CV       |         |                                                                                 |            |           |          |           |     |    |           |                      |
|          | 1       | Cuneus cortex, pericalcarine cortex, precuneus cortex, superior parietal cortex | R          | 7, 18, 31 | 4819     | 22        | -61 | 26 | 4.48      | $4.7 \times 10^{-4}$ |
|          | 2       | Superior frontal gyrus                                                          | R          | 8-10      | 2081     | 9         | 38  | 35 | 3.32      | $5.0 \times 10^{-3}$ |
|          | 3       | Cuneus cortex, pericalcarine cortex, precuneus cortex, superior parietal cortex | L          | 7, 31     | 3917     | -17       | -73 | 38 | 3.56      | $5.2 \times 10^{-3}$ |
|          | 4       | Superior Frontal cortex                                                         | L          | 6, 8-10   | 1786     | -11       | 60  | 13 | 3.33      | $4.0 \times 10^{-2}$ |
|          | 5       | Medial orbitofrontal cortex                                                     | L          | 30        | 109      | -5        | 8   | -7 | -4.02     | $1.3 \times 10^{-2}$ |
| CT       |         |                                                                                 |            |           |          |           |     |    |           |                      |
|          | 1       | Lingual gyrus, pericalcarine cortex                                             | L          | 17-18     | 3347     | -20       | -73 | 7  | 4.18      | $1.8 \times 10^{-3}$ |
|          | 2       | Cuneus cortex, pericalcarine cortex                                             | R          | 17-18     | 2477     | 23        | -67 | 6  | 3.78      | $7.5 \times 10^{-3}$ |
|          | 3       | Rostral middle frontal gyrus, superior frontal gyrus                            | L          | 8-10      | 2082     | -25       | 15  | 38 | 3.35      | $1.1 \times 10^{-2}$ |
|          | 4       | Medial orbitofrontal cortex                                                     | L          | 30        | 87       | -5        | 9   | -7 | -4.14     | $6.4 \times 10^{-3}$ |
| SA       |         |                                                                                 |            |           |          |           |     |    |           |                      |
|          | 1       | Medial orbitofrontal cortex                                                     | L          | 30        | 280      | -6        | 8   | -8 | -3.96     | $3.7 \times 10^{-3}$ |
|          | 2       | Precuneus, posterior cingulate cortex                                           | L          | 23, 31    | 1311     | -7        | -36 | 39 | -2.81     | $99 \times 10^{-3}$  |
|          | 3       | Precuneus, posterior cingulate cortex                                           | R          | 23, 31    | 3194     | 11        | -39 | 32 | -3.45     | $1.1 \times 10^{-2}$ |

Hemisphere: L : Left, R : Right; BA: approximate Brodmann area at  $t_{max}$ ; vertices: number of vertices within the cluster;  $t_{max}$ : maximum t-statistic within the cluster;  $p_{cluster}$ : cluster-corrected p-value.

## S6 – Group-by-IQ associations

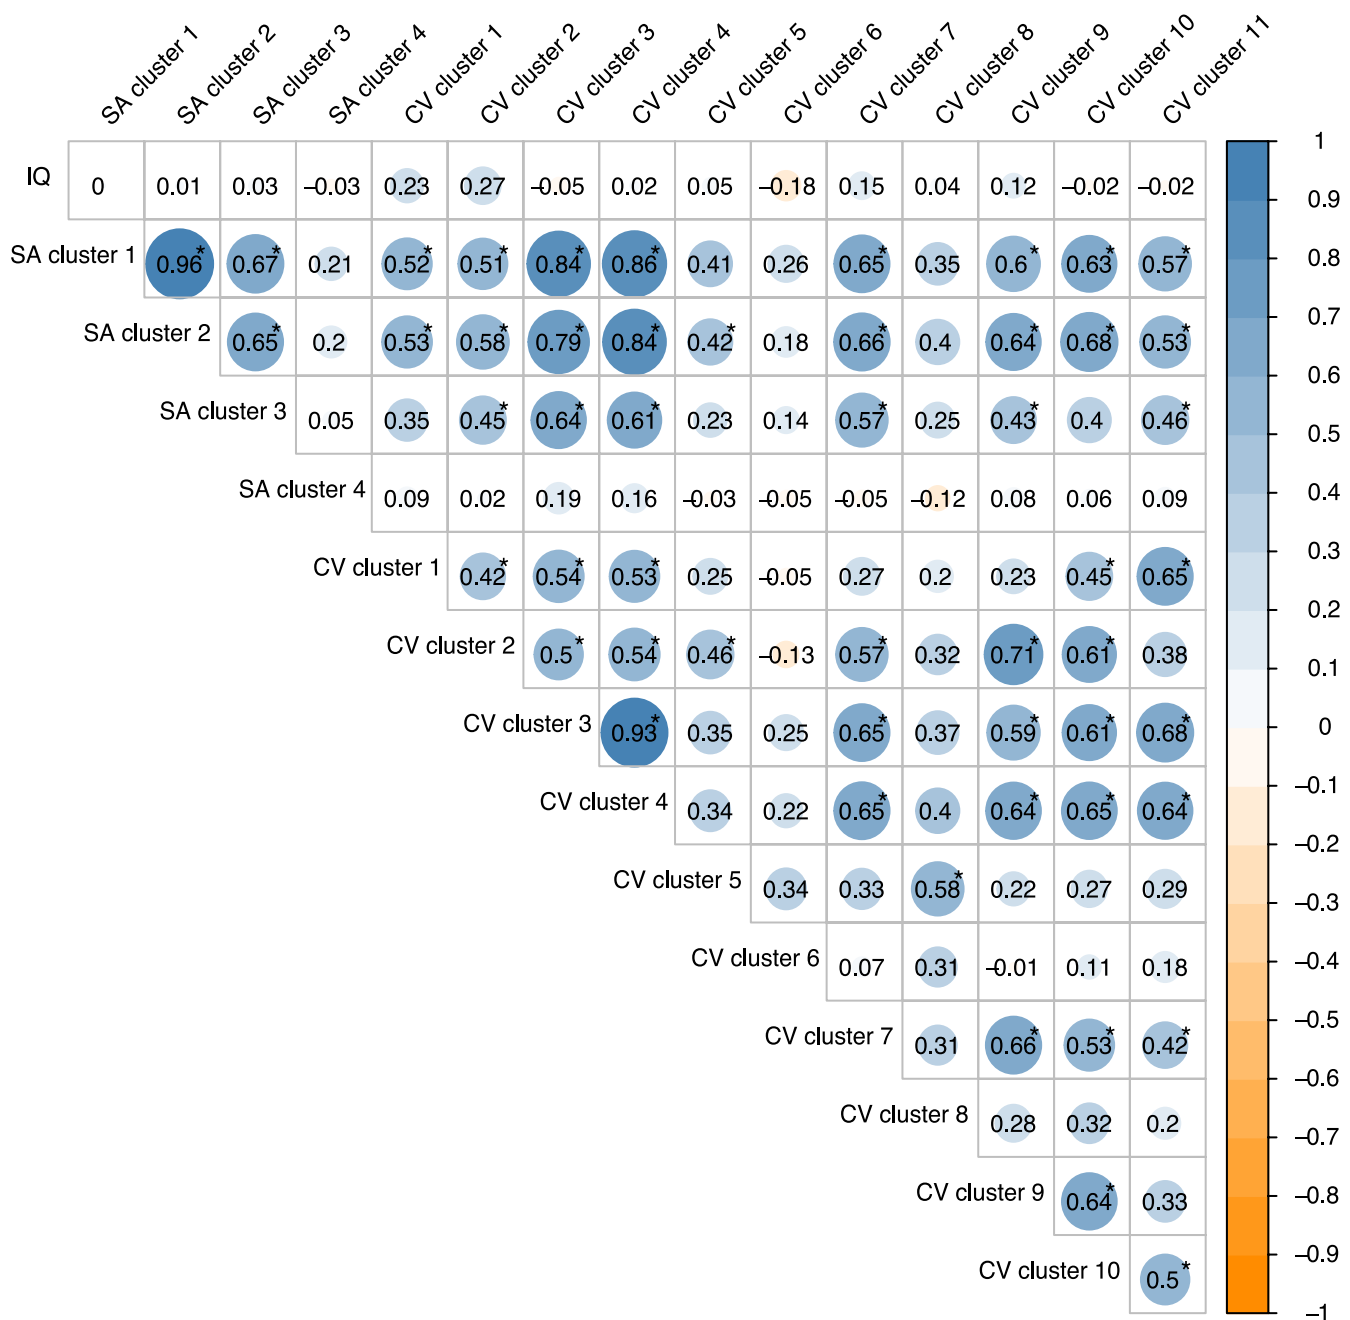

Correlations between IQ and clusters with significant group difference in cortical volume (CV) and surface area (SA) between individuals with 22q11.DS and typically developing controls. Positive correlations are indicated in blue, negative correlations are indicated in orange. Significant correlations ( $p < 0.05$ , Bonferroni corrected) are highlighted with \*.

S7 – Cortical Volume clusters of significant differences in 22q11.2DS compared to controls

| Contrast       | Cluster | Region Labels                                                                                                                 | Hemisphere | BA               | Vertices | Talairach |     |     | $t_{max}$ | $p_{cluster}$        |
|----------------|---------|-------------------------------------------------------------------------------------------------------------------------------|------------|------------------|----------|-----------|-----|-----|-----------|----------------------|
|                |         |                                                                                                                               |            |                  |          | x         | y   | z   |           |                      |
| CV             |         |                                                                                                                               |            |                  |          |           |     |     |           |                      |
| Case > Control |         |                                                                                                                               |            |                  |          |           |     |     |           |                      |
|                | 1       | Precentral gyrus, superior frontal gyrus                                                                                      | R          | 4, 6             | 3418     | 20        | -5  | 53  | 4.36      | $2.2 \times 10^{-3}$ |
| Case < Control |         |                                                                                                                               |            |                  |          |           |     |     |           |                      |
|                | 2       | Caudal anterior-cingulate cortex, cuneus cortex, fusiform gyrus,                                                              | L          | 4-5, 7, 9,       | 37968    | -22       | -43 | -4  | -7.23     | $8.2 \times 10^{-6}$ |
|                | 3       | Cuneus cortex, fusiform gyrus, inferior parietal cortex, inferior temporal gyrus, isthmus-cingulate cortex, lateral occipital | R          | 17-20, 30-31, 37 | 18695    | 24        | -58 | 21  | -5.50     | $8.2 \times 10^{-6}$ |
|                | 4       | Caudal anterior-cingulate cortex, isthmus-cingulate cortex, posterior-cingulate cortex, rostral anterior cingulate cortex,    | R          | 8-9, 23-24, 32   | 6649     | 6         | 6   | 29  | -5.09     | $8.2 \times 10^{-6}$ |
|                | 5       | Entorhinal cortex, fusiform gyrus, inferior temporal gyrus                                                                    | L          | 20, 37           | 1922     | -36       | -30 | -17 | -4.87     | $9.4 \times 10^{-6}$ |
|                | 6       | Uncus                                                                                                                         | R          | 28               | 118      | 25        | -9  | -25 | -3.13     | $1.2 \times 10^{-5}$ |
|                | 7       | Uncus                                                                                                                         | L          | 28               | 495      | -30       | -1  | -24 | -3.32     | $4.2 \times 10^{-4}$ |
|                | 8       | Rostral middle frontal gyrus                                                                                                  | R          | 9, 46            | 3034     | 3         | 37  | 18  | -4.00     | $4.2 \times 10^{-4}$ |
|                | 9       | Superior temporal gyrus, transverse temporal cortex                                                                           | R          | 22, 42, 38       | 3482     | 47        | 10  | -22 | -3.40     | $2.1 \times 10^{-3}$ |
|                | 10      | Banks superior temporal sulcus, inferior parietal cortex, middle temporal gyrus                                               | R          | 39-40            | 3309     | 57        | -53 | 8   | -4.12     | $5.2 \times 10^{-3}$ |
|                | 11      | Paracental lobule, superior frontal gyrus                                                                                     | R          | 1-4, 24          | 2379     | 15        | -14 | 40  | -3.14     | $2.3 \times 10^{-2}$ |

Hemisphere: L: Left, R: Right; BA: approximate Brodmann area at tmax; vertices: number of vertices within the cluster; tmax; maximum t-statistic within the cluster; Pcluster: cluster-corrected p-value. A2:L32
